# Supplementary material for: Effect of a Heating System Using a Ground Source Geothermal Heat Pump on Production Performance, Energy-Saving and Housing Environment of Pigs
Source: MDPI journal article supplement (doi:10.3390/ani10112075), 2020-11-09
Supplement: s1 [file s1]

Supplementary file

# Effect of a heating system using a geothermal heat pump on production performance, energy saving and housing environment of pigs

**Supplementary Table 1.** Specifications of geothermal heat pump.

|                                   |                                                                 |                            |                                             |
|-----------------------------------|-----------------------------------------------------------------|----------------------------|---------------------------------------------|
| Certification Number              | GT-WWH-1-0170                                                   | Installation name          | Water-water geothermal heat pump unit       |
| Model name                        | DHGW 5N-C4-02                                                   | Manufacture company        | Daesung Heat Enersys                        |
| Rating consumption electric power | 4.93 kW                                                         | Rating consumption current | 8.99 A                                      |
| Internal pressure test            | High pressure section 4.07 MPa<br>Low pressure section 2.42 MPa | Max current consumption    | 16.7 A                                      |
| Maximum working pressure          | High pressure section 3.7 MPa<br>Low pressure section 2.2 MPa   | Power supply               | Three-phase four-wire system<br>380 V 60 Hz |
| Refrigerant name                  | R-410A                                                          | Legal freezing capacity    | 2.1 RT                                      |
| Refrigerant injection amount      | 1.35 kg                                                         | Product weight             | 115 kg                                      |
| Inspection passed heat Source     | 2014. 08.                                                       | Manufacturing number       | PGW005140680                                |
| Date of manufacture               | 2014. 08.                                                       |                            |                                             |
| Heating ability                   | IW40-W10 / B05 21.97 / 19.66 kW (5.59 USRT)                     |                            |                                             |
| Cooling ability                   | IW12-W15 / B25 21.86 / 20.59 kW (5.85 USRT)                     |                            |                                             |

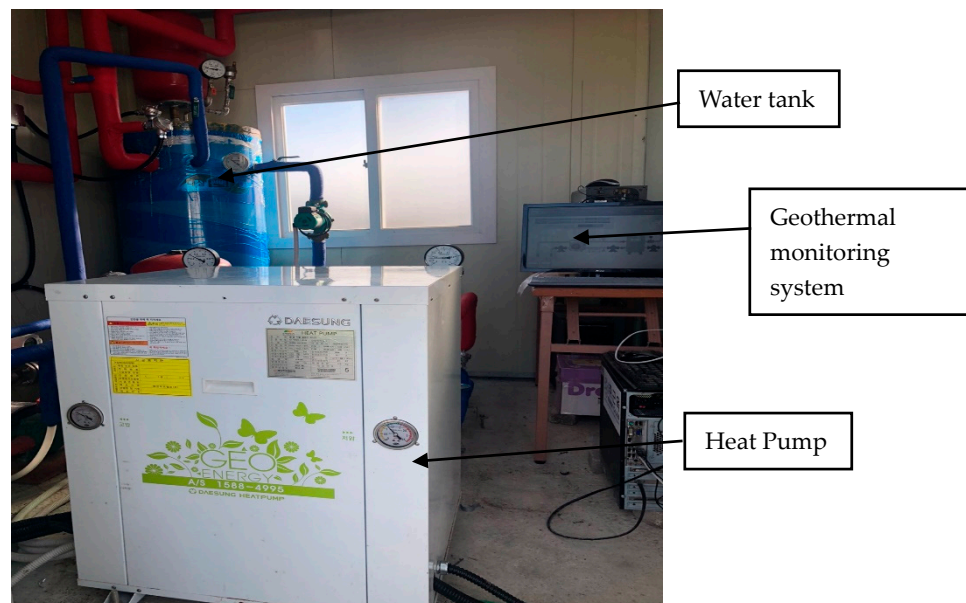

**Supplementary Figure 1.** A geothermal heat pump system.

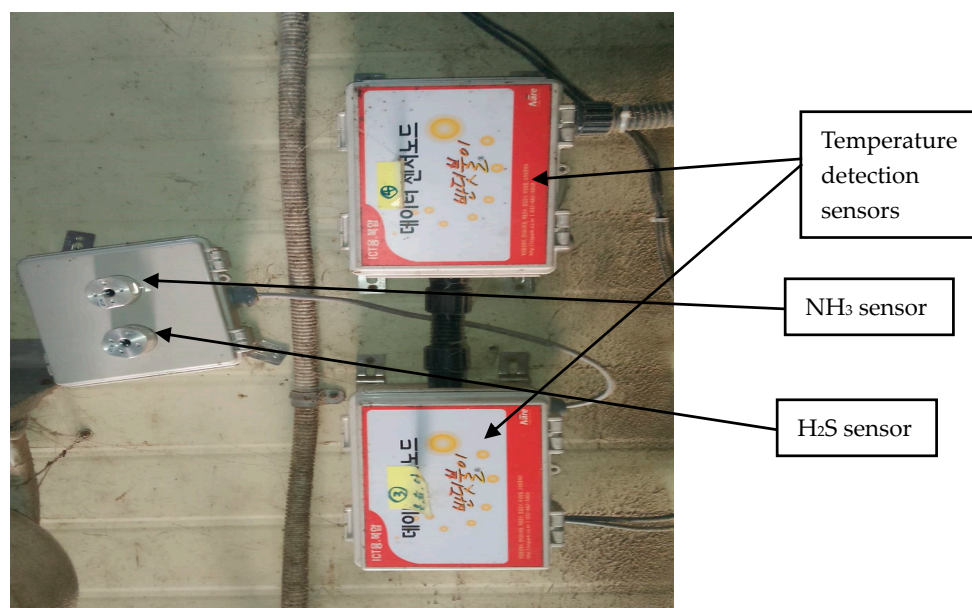

**Supplementary Figure 2.** NR-TH set for temperature and humidity detection. Sensors for determination of  $\text{NH}_3$  and  $\text{H}_2\text{S}$  emission.

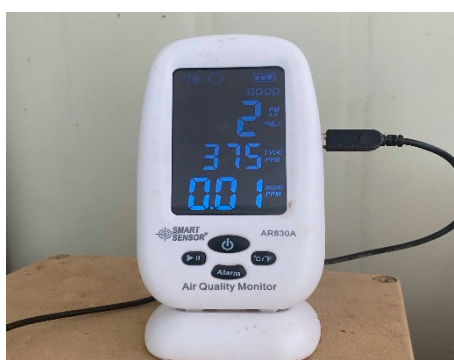

**Supplementary Figure 3.** Smart sensor air quality meter.

**Supplementary Table 2.** Specifications of exhaust fans in pig house.

| Fan <sup>1</sup> | Model name | HP<br>(Horse Power) | RPM<br>(1 minute) | Ventilatory volume<br>(CFM) |       |
|------------------|------------|---------------------|-------------------|-----------------------------|-------|
|                  |            |                     |                   | 10%                         | 100%  |
| Big fan          | KA-400     | 0.1                 | 1,150             | 677                         | 1,574 |
| Small fan        | KA-300     | 0.1                 | 1,700             | 451                         | 1,097 |

<sup>1</sup> Each big house has 1 big fan and 2 small fans.
